# Supplementary material for: Spanish cohort of VEXAS syndrome: clinical manifestations, outcome of treatments and novel evidences about UBA1 mosaicism
Source: PubMed Central journal article supplement — Ann Rheum Dis. 2023 Sep 4;82(12):1594–605. doi: 10.1136/ard-2023-224460 (PMC10646843; doi:10.1136/ard-2023-224460), 2023-09-04
Supplement: ard-2023-224460supp006.pdf [file ard-2023-224460supp006.pdf]

**Spanish Cohort of VEXAS syndrome: Clinical Manifestations, Outcome of Treatments  
and Novel Evidences About *UBA1* Mosaicism**

**SUPPLEMENTARY TABLES**

**Authors**

Jose Manuel Mascaro MD, PhD, Ignasi Rodriguez-Pinto MD, PhD, Gabriela Poza MD, Anna Mensa-Vilaro PhD, Julian Fernandez-Martin MD, PhD, Luis Caminal-Montero MD, Gerard Espinosa MD, PhD, Jose Hernandez-Rodriguez MD, PhD, Marina Diaz MD, PhD, Joana Rita-Marques MD, Raimon Sanmarti MD, PhD, Santos Castañeda MD, PhD, Dolores Colunga MD, PhD, Ruben Coto-Hernandez MD, Patricia Fanlo MD, PhD, Jose Ignacio Elejalde MD, Segundo Buján MD, PhD, Ignasi Figueras MD, PhD, Francisco Manuel Marco MD, PhD, Mariano Andres MD, Silvia Suarez MD, Andres Gonzalez-Garcia MD, PhD, Xavier Fustà-Novell MD, Clara Garcia-Belando MD, Ana Granados MD, Maria Teresa Fernandez-Figueras MD, Neus Quilis MD, Maria Orriols-Caba MD, Ricardo Gomez de la Torre MD, PhD, Maria C. Cid MD, PhD, Georgina Espigol-Frigole MD, PhD, Alba Alvarez Abella MD, Eztizen Labrador MD, PhD, Maria Rozman MD, PhD, Monica Lopez-Guerra PhD, Paola Castillo MD, PhD, Jose R. Alamo-Moreno MD, Eva Gonzalez-Roca PhD, Susana Plaza RA, Virginia Fabregat RA, Rocio Lara RA, Esther F. Vicente-Rabaneda MD, PhD, Sonia Tejedor-Vaquero PhD, Giuliana Magri PhD, Nuria Bonet PhD, Manuel Solis-Moruno PhD, Andrea Cerutti MD, Oscar Fornas PhD, Ferran Casals PhD, Jordi Yagüe MD, PhD, Juan I. Arostegui MD, PhD

**Supplementary Table S1. List of genes included in the targeted gene panel for autoinflammatory diseases.** Abbreviations: ADA2, adenosin deaminase 2; ARPC1B, actin related protein C1B; NOCARH, Neonatal-onset cytopenia, autoinflammation, rash and hemophagocytic lymphohistiocytosis; IL-10, interleukin-10; DIRA, deficiency of interleukin-1 receptor antagonist; DITRA, deficiency of interleukin-36 receptor antagonist; FMF, familial Mediterranean Fever; PAAND, Pyrin-associated autoinflammation with neutrophilic dermatosis; MK, mevalonate kinase; AIFEC, Autoinflammation with infantile enterocolitis; NAIAD, NLRP1-associated autoinflammation with arthritis and dyskeratosis; FCAS2, familial cold-induced autoinflammatory syndrome type 2; CAPS, cryopyrin-associated periodic syndromes; PLAID, PLCG2-associated antibody deficiency, and immune dysregulation; APLAID, Autoinflammation and PLCG2-associated antibody deficiency, and immune dysregulation; CANDLE, Chronic atypical neutrophilic dermatosis with lipodystrophy and elevated temperature; PRAAS, Proteasome-associated autoinflammatory syndrome; PAPA, Pyogenic arthritis, pyoderma gangrenosum and acne; Hz/Hc, Hyperzincemia and hypercalprotectinemia syndrome; HOIL-1, Heme-oxidized IRP2 ubiquitin ligase 1; CRIA, cleavage-resistant RIPK1-induced autoinflammatory syndrome; HOIP, HOIL-1-interacting protein; SAVI, STING-associated vasculopathy with onset in infancy; TRAPS11, TNFRSF11A-associated periodic syndrome; TRAPS, TNF Receptor I-associated periodic syndrome; SIFD, Sideroblastic anemia, B-cell immunodeficiency, periodic fevers, and developmental delay; PFIT, periodic fever, immunodeficiency, and thrombocytopenia syndrome.

| Gene  | Disease                           | Ref Seq        |  | Gene  | Disease      | Ref Seq     |
|-------|-----------------------------------|----------------|--|-------|--------------|-------------|
| ADA2  | ADA2 Deficiency                   | NM_001282225.1 |  | PLCG2 | PLAID-APLAID | NM_002661.3 |
| ADAR  | Aicardi-Goutières syndrome Type 6 | NM_001111.5    |  | POMP  | CANDLE/PRAAS | NM_015932.5 |
| AP1S3 | Pustular Psoriasis                | NM_001039569.1 |  | PSMA3 | CANDLE/PRAAS | NM_002788.3 |

|               |                                   |             |  |                 |                                   |             |
|---------------|-----------------------------------|-------------|--|-----------------|-----------------------------------|-------------|
| <i>ARPC1B</i> | ARPC1B Deficiency                 | NM_005720.4 |  | <i>PSMB4</i>    | CANDLE/PRAAS                      | NM_002796.2 |
| <i>CARD14</i> | Pustular Psoriasis                | NM_024110.4 |  | <i>PSMB8</i>    | CANDLE/PRAAS                      | NM_148919.3 |
| <i>CDC42</i>  | NOCARH                            | NM_001791.4 |  | <i>PSMB9</i>    | CANDLE/PRAAS                      | NM_002800.4 |
| <i>IFIH1</i>  | Aicardi-Goutières syndrome Type 7 | NM_022168.3 |  | <i>PSMG2</i>    | CANDLE/PRAAS                      | NM_020232.4 |
| <i>IL10</i>   | IL-10 Deficiency                  | NM_000572.2 |  | <i>PSTPIP1</i>  | PAPA-Hz/Hc                        | NM_003978.3 |
| <i>IL10RA</i> | IL-10R1 Deficiency                | NM_001558.3 |  | <i>RBCK1</i>    | HOIL-1 Deficiency                 | NM_031229.3 |
| <i>IL10RB</i> | IL-10R2 Deficiency                | NM_000628.4 |  | <i>RELA</i>     | Rel-A Haploinsufficiency          | NM_021975.3 |
| <i>IL1RN</i>  | DIRA                              | NM_173842.2 |  | <i>RIPK1</i>    | CRIA                              | NM_003804.5 |
| <i>IL36RN</i> | DITRA                             | NM_173170.1 |  | <i>RNASEH2A</i> | Aicardi-Goutières syndrome Type 4 | NM_006397.2 |
| <i>LACC1</i>  | Laccase Deficiency                | NM_153218.3 |  | <i>RNASEH2B</i> | Aicardi-Goutières syndrome Type 2 | NM_024570.3 |
| <i>LPIN2</i>  | Majeed syndrome                   | NM_014646.2 |  | <i>RNASEH2C</i> | Aicardi-Goutières syndrome Type 3 | NM_032193.3 |
| <i>MEFV</i>   | FMF-PAAND                         | NM_000243.2 |  | <i>RNF31</i>    | HOIP Deficiency                   | NM_017999.4 |
| <i>MVK</i>    | MK Deficiencies                   | NM_000431.3 |  | <i>SAMHD1</i>   | Aicardi-Goutières syndrome Type 5 | NM_015474.3 |
| <i>NCSTN</i>  | Hidradenitis suppurativa          | NM_015331.2 |  | <i>TMEM173</i>  | SAVI                              | NM_198282.3 |
| <i>NLRC4</i>  | AIFEC                             | NM_021209.4 |  | <i>TNFAIP3</i>  | A20 Haploinsufficiency            | NM_006290.3 |

|               |               |                |  |                  |                                   |             |
|---------------|---------------|----------------|--|------------------|-----------------------------------|-------------|
| <i>NLRP1</i>  | NAIAD         | NM_033004.3    |  | <i>TNFRSF11A</i> | TRAPS11                           | NM_003839.3 |
| <i>NLRP12</i> | FCAS2         | NM_144687.2    |  | <i>TNFRSF1A</i>  | TRAPS                             | NM_001065.3 |
| <i>NLRP3</i>  | CAPS          | NM_001243133.1 |  | <i>TREX1</i>     | Aicardi-Goutières syndrome Type 1 | NM_033629.5 |
| <i>NOD2</i>   | Blau syndrome | NM_022162.2    |  | <i>TRNT1</i>     | SIFD                              | NM_182916.2 |
| <i>OTULIN</i> | Otulipenia    | NM_138348.5    |  | <i>WDR1</i>      | PFIT                              | NM_017491.4 |

**Supplementary Table S2. Primer sequences used for the Sanger method of DNA sequencing.**

| Gene        | Exon  | Forward Primer (5' to 3') | Reverse Primer (5' to 3') |
|-------------|-------|---------------------------|---------------------------|
| <i>UBA1</i> | 2 +3  | AGTCCTCACCTTTCTGTGCC      | CTCATGGCCCAACACATACC      |
| <i>UBA1</i> | 4+5   | AGACGAGGGCCTTTACTCCC      | GCCTGCATACTCTAGTCCCC      |
| <i>UBA1</i> | 6+7   | TTTGTGAAAGAGGCTGACCC      | ATCCAGGCAGGTAACCACAC      |
| <i>UBA1</i> | 8     | GCCACTCAGTGCTATGGTTTC     | ACACCAGGATGTGTCTTCCC      |
| <i>UBA1</i> | 9+10  | CCTGGAGCTGAGGGAAGAC       | GGGCCAGAAAGAACCAAGAG      |
| <i>UBA1</i> | 11+12 | AATGAGGTGGGTGAGTGGG       | GTCTGAGCCAAACACAGCC       |
| <i>UBA1</i> | 13    | TCTCCCTGAGGACAAAGAGG      | GGCTTCCCTTCAAGATAAGGAG    |
| <i>UBA1</i> | 14    | TGCAACCTGAAGATGTGGTG      | AAAGTGAGACGACAAAGCCC      |
| <i>UBA1</i> | 15    | GCCTGTGTGATGGAGAGAGAC     | GAGAGCTAGGAAAGAAACATCAGG  |
| <i>UBA1</i> | 16    | GGGCAAAGTTGTGTGTGTTTC     | ATGCAACATCTGAAGGCAAG      |
| <i>UBA1</i> | 17    | TTCCCCACTTCCAGAGTAGC      | ACCCCAAACAACATGAGGC       |
| <i>UBA1</i> | 18    | CATGAATGAGTGGCTGTTGG      | TCTCAGATCCCCATGCCTC       |
| <i>UBA1</i> | 19+20 | GTGATTGGCTCCAGTCCG        | GGTGTGGGTAAACCTCAGGC      |
| <i>UBA1</i> | 21+22 | CCAGGATGTCTCTCCTTCC       | TTGCTCTGAGAGACAGAAGGG     |
| <i>UBA1</i> | 23    | GCACAAGGTGAGGGGAATC       | TTTTCGCACGTAICTCAAATAATG  |

|             |       |                       |                       |
|-------------|-------|-----------------------|-----------------------|
| <i>UBA1</i> | 24+25 | TGACTAAACACGTCTGCATGG | GTAGGGGCAGTGA ACTGGAG |
| <i>UBA1</i> | 26    | CTAGGGGAGGCCCTGTATG   | GGGATGATGAGGGAACACC   |

**Supplementary Table S3. Classification of Post-zygotic *UBA1* Variants.** <sup>1</sup>Genome Build: GRCh37/hg19. <sup>2</sup>RefSeq: NM\_003334.4. <sup>3</sup>Classification of pathogenicity of gene variants performed on the basis of standards and guidelines proposed in the consensus recommendations of the American College of Medical Genetics and Genomics and the Association for Molecular Pathology. Abbreviations: Chr, chromosome; 1000 GP, 1000 Genomes Project Phase 3; NHLBI-ESP, National Heart, Lung and Blood Institute-Exome Sequencing Project; gnomAD, Genome Aggregation Database; CSVS, Collaborative Spanish Variant Server; SIFT, Sorting Intolerant from Tolerant; CADD, Combined Annotation Dependent Deletion; ACMG / AMP, American College of Medical Genetics and Genomics / Association for Molecular Pathology; n.a., not applicable.

| Structural Features of Variants              |                              |                 |                 |                 |
|----------------------------------------------|------------------------------|-----------------|-----------------|-----------------|
| Chromosome position <sup>1</sup>             | Chr X: 47058446              | Chr X: 47058450 | Chr X: 47058450 | Chr X: 47058451 |
| Reference allele                             | G                            | A               | A               | T               |
| Variant allele                               | C                            | C               | G               | C               |
| Gene <sup>2</sup>                            | <i>UBA1</i>                  | <i>UBA1</i>     | <i>UBA1</i>     | <i>UBA1</i>     |
| Exon/Intron                                  | Intron 2                     | Exon 3          | Exon 3          | Exon 3          |
| cDNA alteration                              | c.118-1G>C                   | c.121A>C        | c.121A>G        | c.122T>C        |
| Predicted amino acid alteration              | Splice acceptor site variant | p.(Met41Leu)    | p.(Met41Val)    | p.(Met41Thr)    |
| Population Genetics (MAF) (%)                |                              |                 |                 |                 |
| 1000 Genomes Project Phase 3 (2015 release)  | 0                            | 0               | 0               | 0               |
| NHLBI-ESP (ESP6500SI-V2 version)             | 0                            | 0               | 0               | 0               |
| Kaviar database (160204 version)             | 0                            | 0               | 0               | 0               |
| gnomAD (v2.1.1)                              | 0                            | 0               | 0               | 0               |
| CSVS (3.0.1. version; February 2021 release) | 0                            | 0               | 0               | 0               |

|                                                |                 |                    |                  |                 |
|------------------------------------------------|-----------------|--------------------|------------------|-----------------|
| Bioinformatics                                 |                 |                    |                  |                 |
| Polyphen-2 (Hum Var)                           | n.a.            | Benign (0.021)     | Benign (0.002)   | Benign (0.008)  |
| SIFT (Score)                                   | n.a.            | Deleterious (0.05) | Tolerated (0.11) | Tolerated (0.1) |
| Mutation Taster                                | Disease causing | Disease causing    | Disease causing  | Disease causing |
| CADD PHRED                                     | 35              | 23.2               | 21.6             | 22.3            |
| Phenotype-Genotype Databases                   |                 |                    |                  |                 |
| ClinVar database                               | Pathogenic      | Pathogenic         | Pathogenic       | Pathogenic      |
| INFEVERS database                              | Pathogenic      | Pathogenic         | Pathogenic       | Pathogenic      |
|                                                |                 |                    |                  |                 |
| ACMG / AMP Variant Classification <sup>3</sup> | Pathogenic      | Pathogenic         | Pathogenic       | Pathogenic      |



**Supplementary Table S4. Results of *UBA1* Genotyping in Patient's Healthy Daughters.** <sup>1</sup>RefSeq: NM\_003334.4. <sup>2</sup>Mean of data collected from three independent experiments. Abbreviations: ADS, amplicon-based deep sequencing; n.p., not performed.

| Patient        |                                             |                                  | Patient's Healthy Daughter |                  | ADS                                     |                       |
|----------------|---------------------------------------------|----------------------------------|----------------------------|------------------|-----------------------------------------|-----------------------|
| Patient's Code | Nucleotide <i>UBA1</i> Variant <sup>1</sup> | Amino Acid Exchange <sup>1</sup> | Number                     | Sample           | Mutant Allele Fraction (%) <sup>2</sup> | Coverage <sup>2</sup> |
| Pt 6           | c.122T>C                                    | p.Met41Thr                       | # 1                        | Peripheral Blood | 0.0                                     | 1935x                 |
| Pt 8           | c.121A>C                                    | p.Met41Leu                       | # 1                        | Peripheral Blood | 0.0                                     | 1900x                 |
| Pt 26          | c.122T>C                                    | p.Met41Thr                       | # 1                        | Peripheral Blood | 0.0                                     | 1675x                 |
|                |                                             |                                  | # 2                        | Peripheral Blood | 0.0                                     | 2019x                 |
|                |                                             |                                  | # 3                        | Peripheral Blood | 0.0                                     | 1305x                 |
| Pt 29          | c.122T>C                                    | p.Met41Thr                       | # 1                        | Peripheral Blood | 0.0                                     | 1884x                 |
| Pt 32          | c.121A>G                                    | p.Met41Val                       | # 1                        | Peripheral Blood | 0.0                                     | 1862x                 |
| Pt 38          | c.121A>C                                    | p.Met41Leu                       | # 1                        | Peripheral Blood | 0.0                                     | 1440x                 |

**Supplementary Table S5. Demographic data of genetically-confirmed VEXAS patients.** Abbreviations: allo-HSCT, allogeneic haematopoietic stem cell transplantation.

|       | Sex  | Status   | Current Age or age at death (years) | Age at disease onset (years) | Years of disease (alive patients) | Years of disease until death or allo-HSCT | Cause of death                                                                                            |
|-------|------|----------|-------------------------------------|------------------------------|-----------------------------------|-------------------------------------------|-----------------------------------------------------------------------------------------------------------|
| Pt 1  | Male | Deceased | 73                                  | 72                           | -                                 | 1                                         | Respiratory insufficiency                                                                                 |
| Pt 3  | Male | Deceased | 73                                  | 67                           | -                                 | 6                                         | Unknown                                                                                                   |
| Pt 4  | Male | Deceased | 77                                  | 73                           | -                                 | 4                                         | Pneumonia and respiratory insufficiency                                                                   |
| Pt 6  | Male | Alive    | 56                                  | 52                           | 4                                 | -                                         |                                                                                                           |
| Pt 8  | Male | Alive    | 84                                  | 78                           | 6                                 | -                                         |                                                                                                           |
| Pt 9  | Male | Alive    | 66                                  | 62                           | 4                                 | -                                         |                                                                                                           |
| Pt 10 | Male | Deceased | 62                                  | 52                           | -                                 | 3 (allo-HSCT)                             | Multiple complications after bilateral leg amputation to treat diabetes mellitus-related arterial disease |
| Pt 12 | Male | Alive    | 68                                  | 61                           | 7                                 | -                                         |                                                                                                           |
| Pt 14 | Male | Deceased | 79                                  | 75                           | -                                 | 4                                         | Unknown                                                                                                   |
| Pt 15 | Male | Deceased | 67                                  | 65                           | -                                 | 4                                         | Septic shock                                                                                              |
| Pt 16 | Male | Alive    | 79                                  | 77                           | 2                                 | -                                         |                                                                                                           |
| Pt 17 | Male | Deceased | 77                                  | 70                           | -                                 | 7                                         | Septic shock                                                                                              |
| Pt 20 | Male | Alive    | 63                                  | 60                           | 3                                 | -                                         |                                                                                                           |
| Pt 21 | Male | Deceased | 74                                  | 66                           | -                                 | 7                                         | Pneumonia and respiratory                                                                                 |

|       |      |          |    |    |     |    |                                         |
|-------|------|----------|----|----|-----|----|-----------------------------------------|
|       |      |          |    |    |     |    | insufficiency                           |
| Pt 22 | Male | Alive    | 72 | 67 | 5   | -  |                                         |
| Pt 24 | Male | Alive    | 75 | 72 | 3   | -  |                                         |
| Pt 25 | Male | Alive    | 81 | 74 | 7   | -  |                                         |
| Pt 26 | Male | Deceased | 74 | 63 | -   | 11 | Pneumonia and respiratory insufficiency |
| Pt 29 | Male | Alive    | 71 | 65 | 6   | -  |                                         |
| Pt 30 | Male | Alive    | 58 | 55 | 3   | -  |                                         |
| Pt 32 | Male | Alive    | 72 | 69 | 3   | -  |                                         |
| Pt 33 | Male | Alive    | 74 | 66 | 8   | -  |                                         |
| Pt 34 | Male | Deceased | 63 | 60 | -   | 3  | Unknown                                 |
| Pt 35 | Male | Alive    | 78 | 74 | 4   | -  |                                         |
| Pt 36 | Male | Deceased | 68 | 59 | -   | 8  | Pneumonia and respiratory insufficiency |
| Pt 38 | Male | Alive    | 86 | 85 | 1   | -  |                                         |
| Pt 39 | Male | Deceased | 72 | 64 | -   | 8  | Septic shock                            |
| Pt 40 | Male | Alive    | 88 | 86 | 2   | -  |                                         |
| Pt 41 | Male | Alive    | 70 | 70 | 0.5 | -  |                                         |
| Pt 42 | Male | Alive    | 71 | 67 | 4   | -  |                                         |

**Supplementary Table S6. Detailed clinical data of genetically-confirmed VEXAS patients.** Abbreviations: Rec, recurrent; MAS, macrophage activation syndrome; +, present; -, absent; Mon, monoarthritis; Olig, oligoarthritis; Pol, polyarthritis.

|       | Skin lesions                 |                  |                   |                        |                 |              | Rec. fever | Pulmonary manifestations |                           | Ocular manifestations |                 |              |         |             | Recurrent chondritis |      |                   |                   | Musculoskeletal manifestations |           |                    | Others   |                        |                     |
|-------|------------------------------|------------------|-------------------|------------------------|-----------------|--------------|------------|--------------------------|---------------------------|-----------------------|-----------------|--------------|---------|-------------|----------------------|------|-------------------|-------------------|--------------------------------|-----------|--------------------|----------|------------------------|---------------------|
|       | Erythematous Papules/Plaques | Purpuric Plaques | Vesicular lesions | Urticaria-like lesions | Livedo racemosa | Panniculitis |            | Lung infiltrates         | Respiratory Insufficiency | Conjunctivitis        | Palpebral Edema | Episcleritis | Uveitis | Papilledema | Ear                  | Nose | Respiratory tract | Costal cartilages | Arthralgia                     | Arthritis | Myalgia / Myositis | Headache | Venous thromboembolism | Arterial thrombosis |
| Pt 1  | +                            | +                | -                 | -                      | -               | +            | +          | +                        | +                         | -                     | -               | -            | -       | -           | -                    | -    | -                 | +                 | Olig                           | +         | +                  | +        | -                      | -                   |
| Pt 3  | +                            | -                | +                 | +                      | +               | +            | +          | -                        | -                         | -                     | -               | +            | -       | +           | -                    | -    | -                 | +                 | Pol                            | -         | -                  | -        | -                      | -                   |
| Pt 4  | +                            | -                | -                 | -                      | -               | +            | +          | +                        | +                         | -                     | -               | +            | -       | +           | -                    | -    | -                 | -                 | -                              | -         | -                  | -        | -                      | -                   |
| Pt 6  | +                            | +                | -                 | -                      | +               | +            | +          | +                        | -                         | -                     | -               | -            | -       | +           | +                    | +    | -                 | -                 | -                              | -         | -                  | -        | +                      | -                   |
| Pt 8  | +                            | +                | -                 | -                      | -               | -            | +          | +                        | -                         | -                     | +               | -            | -       | +           | -                    | -    | -                 | +                 | Pol                            | -         | -                  | +        | -                      | -                   |
| Pt 9  | -                            | -                | -                 | -                      | -               | -            | -          | -                        | -                         | -                     | -               | +            | -       | +           | -                    | -    | -                 | +                 | Pol                            | -         | -                  | +        | -                      | -                   |
| Pt 10 | +                            | -                | -                 | -                      | -               | -            | +          | -                        | -                         | -                     | -               | -            | -       | -           | -                    | -    | -                 | -                 | -                              | -         | -                  | -        | -                      | -                   |
| Pt 12 | +                            | -                | -                 | -                      | -               | -            | +          | -                        | -                         | -                     | -               | -            | -       | -           | -                    | -    | -                 | -                 | -                              | -         | -                  | -        | -                      | -                   |
| Pt 14 | +                            | -                | -                 | +                      | +               | -            | +          | +                        | -                         | -                     | -               | -            | -       | -           | -                    | -    | -                 | -                 | -                              | -         | -                  | -        | -                      | -                   |

|       |   |   |   |   |   |   |   |   |   |   |   |   |   |   |   |   |   |   |     |      |   |   |   |   |   |
|-------|---|---|---|---|---|---|---|---|---|---|---|---|---|---|---|---|---|---|-----|------|---|---|---|---|---|
| Pt 15 | + | - | - | + | - | - | - | - | - | - | - | - | - | - | + | - | - | - | +   | Olig | + | - | - | - | - |
| Pt 16 | - | + | - | - | - | - | + | + | + | - | - | - | - | - | - | - | - | - | +   | Olig | + | + | - | - | + |
| Pt 17 | + | - | - | - | - | + | + | - | - | - | - | + | - | + | - | - | - | + | Pol | -    | - | - | - | - |   |
| Pt 20 | - | + | - | - | - | - | + | + | + | + | + | - | - | - | - | - | - | - | -   | -    | - | - | + | - | + |
| Pt 21 | + | - | - | - | + | - | - | - | - | - | + | - | - | - | + | - | - | - | +   | Pol  | - | - | - | - | - |
| Pt 22 | + | + | - | + | + | - | + | + | + | + | - | - | - | - | + | + | - | - | +   | Mon  | - | - | + | + | - |
| Pt 24 | + | + | - | + | - | - | - | - | - | - | - | - | - | - | - | - | - | - | -   | -    | - | - | + | + | - |
| Pt 25 | - | - | - | - | - | - | - | - | - | - | - | - | + | - | + | + | - | - | +   | Pol  | - | - | - | - | - |
| Pt 26 | + | - | - | + | - | + | + | + | - | - | - | - | - | - | - | - | - | - | +   | Pol  | - | - | - | - | - |
| Pt 29 | + | + | + | - | + | + | + | + | + | + | + | + | - | - | - | - | - | - | +   | Pol  | - | - | + | - | - |
| Pt 30 | - | - | - | - | - | - | - | - | - | - | + | - | - | - | + | - | - | - | +   | -    | + | - | + | - | - |
| Pt 32 | - | - | - | - | - | + | + | + | - | - | - | - | - | - | - | - | - | - | +   | Pol  | + | + | - | - | - |
| Pt 33 | - | - | - | + | - | + | + | + | - | - | - | - | - | - | + | - | + | - | +   | Pol  | - | - | + | + | - |
| Pt 34 | + | + | - | - | - | - | - | - | - | - | - | - | - | - | - | - | - | - | -   | -    | - | - | + | - | - |
| Pt 35 | - | + | - | - | - | - | + | + | + | - | - | + | + | - | + | + | - | - | -   | -    | - | - | - | - | - |
| Pt 36 | + | - | + | - | - | - | + | - | + | + | + | - | - | + | + | + | - | - | +   | Mon  | - | + | + | - | - |
| Pt 38 | - | + | - | - | + | - | - | + | - | - | - | - | - | - | - | - | - | - | -   | -    | - | - | - | - | - |
| Pt 39 | + | + | - | - | - | - | + | - | - | + | + | + | - | + | + | + | + | - | +   | -    | - | - | + | - | - |
| Pt 40 | + | + | - | - | - | - | - | + | - | - | + | - | - | - | - | - | - | - | +   | Pol  | - | - | - | - | - |
| Pt 41 | + | + | - | + | - | - | + | + | + | - | - | - | - | - | - | - | - | - | -   | -    | - | - | - | - | - |
| Pt 42 | - | - | - | + | - | - | - | - | + | + | - | - | - | - | + | - | - | - | +   | -    | - | - | - | - | - |

**Supplementary Table S7. Detailed results of biochemistry tests performed in genetically-confirmed VEXAS patients.** Abbreviations: RR, reference range; ESR, erythrocyte sedimentation rate; n.p., not performed; n.a., not available.

|       | Ferritin (ng/mL)<br>RR: 20-400 ng/mL |           | Increased Ferritin<br>(>400 ng/mL) |         | High Increased Ferritin<br>(>1000 ng/mL) |         | Increased ESR<br>(>10 mm/h) |         | High Increased ESR<br>(>50 mm/h) |         | Bone Marrow<br>Vacuoles |
|-------|--------------------------------------|-----------|------------------------------------|---------|------------------------------------------|---------|-----------------------------|---------|----------------------------------|---------|-------------------------|
|       | Mean                                 | Range     | %                                  | n/total | %                                        | n/total | %                           | n/total | %                                | n/total |                         |
| Pt 1  | 1889                                 | 421-5032  | 100                                | 13/13   | 61.5                                     | 8/13    | 100                         | 23/23   | 87                               | 20/23   | Yes                     |
| Pt 3  | 3712                                 | 1000-7747 | 100                                | 15/15   | 100                                      | 15/15   | 100                         | 13/13   | 100                              | 13/13   | Yes                     |
| Pt 4  | 384                                  | 295-472   | 50                                 | 1/2     | 0                                        | 0/2     | 100                         | 13/13   | 100                              | 13/13   | Yes                     |
| Pt 6  | 1374                                 | 224-5157  | 88.6                               | 39/44   | 52.3                                     | 23/44   | 100                         | 24/24   | 87.5                             | 21/24   | Yes                     |
| Pt 8  | 167                                  | 92-327    | 0                                  | 0/11    | 0                                        | 0/11    | 86.5                        | 32/37   | 35.1                             | 13/37   | Yes                     |
| Pt 9  | 150                                  | 54-329    | 0                                  | 0/11    | 0                                        | 0/11    | 87.5                        | 35/40   | 75                               | 30/40   | Yes                     |
| Pt 10 | 1554                                 | 380-2377  | 85.7                               | 6/7     | 57.1                                     | 4/7     | 100                         | 4/4     | 100                              | 4/4     | Yes                     |
| Pt 12 | 2058                                 | 1617-2602 | 100                                | 4/4     | 100                                      | 4/4     | 100                         | 6/6     | 100                              | 6/6     | n.p.                    |
| Pt 14 | 2453                                 | 1758-4223 | 100                                | 4/4     | 100                                      | 4/4     | 100                         | 12/12   | 100                              | 12/12   | n.p.                    |
| Pt 15 | 763                                  | 204-2167  | 60                                 | 3/5     | 20                                       | 1/5     | 100                         | 9/9     | 88.9                             | 8/9     | n.p.                    |
| Pt 16 | 3615                                 | 292-11931 | 87.5                               | 14/16   | 56.2                                     | 9/16    | 100                         | 12/12   | 91.7                             | 11/12   | Yes                     |
| Pt 17 | 1252                                 | 545-3256  | 100                                | 13/13   | 53.8                                     | 7/13    | 100                         | 12/12   | 100                              | 12/12   | Yes                     |
| Pt 20 | 973                                  | 654-1971  | 100                                | 5/5     | 20                                       | 1/5     | 100                         | 5/5     | 60                               | 3/5     | Yes                     |
| Pt 21 | 396                                  | 158-558   | 50                                 | 4/8     | 0                                        | 0/8     | 91.7                        | 11/12   | 41.7                             | 5/12    | Yes                     |
| Pt 22 | 289                                  | 54-698    | 33.3                               | 3/9     | 0                                        | 0/9     | 100                         | 19/19   | 73.7                             | 14/19   | Yes                     |
| Pt 24 | 362                                  | 362-362   | 0                                  | 0/1     | 0                                        | 0/1     | 100                         | 2/2     | 0                                | 0/2     | Yes                     |
| Pt 25 | 1276                                 | 633-2844  | 100                                | 19/19   | 63.1                                     | 12/19   | 95.5                        | 21/22   | 68.2                             | 15/22   | Yes                     |
| Pt 26 | n.a.                                 | n.a.      | n.a.                               | n.a.    | n.a.                                     | n.a.    | 100                         | 7/7     | 57.1                             | 4/7     | Yes                     |
| Pt 29 | 711                                  | 307-1209  | 75                                 | 6/8     | 25                                       | 2/8     | 100                         | 13/13   | 92.3                             | 12/13   | Yes                     |
| Pt 30 | 517                                  | 408-622   | 100                                | 4/4     | 0                                        | 0/4     | 100                         | 1/1     | 100                              | 1/1     | Yes                     |

|       |      |           |      |       |      |      |      |       |      |       |      |
|-------|------|-----------|------|-------|------|------|------|-------|------|-------|------|
| Pt 32 | 1216 | 281-5414  | 77.8 | 7/9   | 22.2 | 2/9  | 100  | 10/10 | 50   | 5/10  | n.p. |
| Pt 33 | 702  | 250-1210  | 80   | 12/15 | 20   | 3/15 | 94.4 | 17/18 | 50   | 9/18  | Yes  |
| Pt 34 | 1438 | 1073-1992 | 100  | 7/7   | 100  | 7/7  | 37.5 | 3/8   | 0    | 0/8   | Yes  |
| Pt 35 | 807  | 645-1024  | 100  | 3/3   | 33.3 | 1/3  | 100  | 10/10 | 100  | 10/10 | n.p. |
| Pt 36 | 856  | 203-1726  | 71.4 | 5/7   | 57.1 | 4/7  | 100  | 29/29 | 86.2 | 25/29 | Yes  |
| Pt 38 | 208  | 179-266   | 0    | 0/5   | 0    | 0/5  | 85.7 | 6/7   | 57.1 | 4/7   | Yes  |
| Pt 39 | n.a. | n.a.      | n.a. | n.a.  | n.a. | n.a. | 100  | 6/6   | 50   | 3/6   | Yes  |
| Pt 40 | 1282 | 1282-1282 | 100  | 1/1   | 100  | 1/1  | 100  | 4/4   | 50   | 2/4   | n.p. |
| Pt 41 | 1471 | 1264-1624 | 100  | 5/5   | 100  | 5/5  | 100  | 6/6   | 100  | 6/6   | Yes  |
| Pt 42 | 693  | 641-744   | 100  | 2/2   | 0    | 0/2  | n.a. | n.a.  | n.a. | n.a.  | n.p. |

**Supplementary Table S8. Detailed results of haematological tests performed in genetically-confirmed VEXAS patients.** Abbreviations: MCV, mean corpuscular volume; RR, reference range; WBC, white blood cells; n.a., not available.

|       | Haemoglobin (g/L)<br>RR: 130-170 g/L |        | Haemoglobin <120 g/L |         | MCV (fL)<br>RR: 80-100 fL |         | Macrocytosis<br>MCV >100 fL |         | Hematocrit<br><36% |         | Platelets (10 <sup>9</sup> /L)<br>RR: 140-400·10 <sup>9</sup> /L |         | Platelets<br><140·10 <sup>9</sup> /L |         | WBC (10 <sup>9</sup> /L)<br>RR: 4-11·10 <sup>9</sup> /L |          |
|-------|--------------------------------------|--------|----------------------|---------|---------------------------|---------|-----------------------------|---------|--------------------|---------|------------------------------------------------------------------|---------|--------------------------------------|---------|---------------------------------------------------------|----------|
|       | Mean                                 | Range  | %                    | n/total | Mean                      | Range   | %                           | n/total | %                  | n/total | Mean                                                             | Range   | %                                    | n/total | Mean                                                    | Range    |
| Pt 1  | 88.1                                 | 67-131 | 93.5                 | 58/62   | 102                       | 95-117  | 51.6                        | 32/62   | 93.5               | 58/62   | 202                                                              | 46-383  | 24.2                                 | 15/62   | 3                                                       | 0.6-8.4  |
| Pt 3  | 79.7                                 | 64-111 | 100                  | 20/20   | 103                       | 92-119  | 65                          | 13/20   | 100                | 20/20   | 68                                                               | 15-125  | 100                                  | 20/20   | 9.9                                                     | 6.2-16.2 |
| Pt 4  | 105                                  | 88-125 | 93.8                 | 30/32   | 96                        | 88-103  | 21.9                        | 7/32    | 87.5               | 28/32   | 267                                                              | 94-430  | 9.4                                  | 3/32    | 6.1                                                     | 0.2-15.9 |
| Pt 6  | 85.6                                 | 65-138 | 96.7                 | 117/121 | 109                       | 99-128  | 99.2                        | 120/121 | 95                 | 115/121 | 133                                                              | 15-740  | 66.9                                 | 81/121  | 7.9                                                     | 1.5-21   |
| Pt 8  | 119.2                                | 79-143 | 59.6                 | 31/52   | 110                       | 95-125  | 84.6                        | 44/52   | 40.4               | 21/52   | 143                                                              | 73-250  | 48.1                                 | 25/52   | 5.7                                                     | 3.7-8.7  |
| Pt 9  | 101.8                                | 70-145 | 88.2                 | 45/51   | 107                       | 98-118  | 94.1                        | 48/51   | 80.4               | 41/51   | 241                                                              | 70-753  | 15.7                                 | 8/51    | 3.6                                                     | 1.6-6.4  |
| Pt 10 | 91.9                                 | 66-119 | 100                  | 21/21   | 115                       | 102-128 | 100                         | 21/21   | 100                | 21/21   | 126                                                              | 61-335  | 76.2                                 | 16/21   | 3.6                                                     | 2-5.8    |
| Pt 12 | 104.5                                | 68-161 | 72.2                 | 13/18   | 109                       | 91-126  | 83.3                        | 15/18   | 72.2               | 13/18   | 134                                                              | 34-317  | 72.2                                 | 13/18   | 11                                                      | 3.9-33.3 |
| Pt 14 | 87.2                                 | 66-106 | 100                  | 17/17   | 107                       | 91-128  | 76.5                        | 13/17   | 100                | 17/17   | 136                                                              | 61-304  | 52.9                                 | 9/17    | 6.7                                                     | 2.5-15.7 |
| Pt 15 | 105.9                                | 93-126 | 93.3                 | 14/15   | 100                       | 85-113  | 53.3                        | 8/15    | 93.3               | 14/15   | 143                                                              | 76-237  | 60                                   | 9/15    | 4                                                       | 2.5-5.6  |
| Pt 16 | 100.6                                | 67-131 | 91.7                 | 22/24   | 95                        | 88-101  | 12.5                        | 3/24    | 95.8               | 23/24   | 222                                                              | 145-308 | 0                                    | 0/24    | 4.7                                                     | 2.2-8.3  |
| Pt 17 | 103.8                                | 70-122 | 93.3                 | 14/15   | 108                       | 100-124 | 100                         | 15/15   | 86.7               | 13/15   | 159                                                              | 77-237  | 26.7                                 | 4/15    | 5.1                                                     | 1.6-9.9  |
| Pt 20 | 97.3                                 | 79-115 | 100                  | 15/15   | 107                       | 98-117  | 86.7                        | 13/15   | 93.3               | 14/15   | 120                                                              | 66-187  | 73.3                                 | 11/15   | 7.3                                                     | 3.3-11.6 |
| Pt 21 | 91.4                                 | 59-113 | 100                  | 29/29   | 105                       | 89-120  | 65.5                        | 19/29   | 100                | 29/29   | 93                                                               | 9-280   | 86.2                                 | 25/29   | 5.5                                                     | 2.1-12.1 |
| Pt 22 | 100.1                                | 73-127 | 92.9                 | 39/42   | 103                       | 97-116  | 85.7                        | 36/42   | 90.5               | 38/42   | 142                                                              | 54-255  | 47.6                                 | 20/42   | 3.4                                                     | 1.3-7.8  |
| Pt 24 | 97.1                                 | 84-109 | 100                  | 7/7     | 106                       | 103-109 | 100                         | 7/7     | 100                | 7/7     | 140                                                              | 77-236  | 57.1                                 | 4/7     | 4.5                                                     | 3.5-5.5  |
| Pt 25 | 102.3                                | 68-143 | 70.5                 | 31/44   | 109                       | 96-123  | 88.6                        | 39/44   | 72.7               | 32/44   | 160                                                              | 63-413  | 59.1                                 | 26/44   | 5                                                       | 2.4-15.1 |
| Pt 26 | 117                                  | 88-137 | 62.5                 | 10/16   | 102                       | 93-107  | 75                          | 12/16   | 68.8               | 11/16   | 149                                                              | 105-215 | 43.8                                 | 7/16    | 5.7                                                     | 3.5-7.4  |
| Pt 29 | 105.6                                | 64-130 | 89.5                 | 17/19   | 106                       | 97-117  | 84.2                        | 16/19   | 89.5               | 17/19   | 143                                                              | 27-225  | 42.1                                 | 8/19    | 5.8                                                     | 2.2-13.9 |



|       |       |        |      |       |     |         |      |       |      |       |     |         |      |       |      |          |
|-------|-------|--------|------|-------|-----|---------|------|-------|------|-------|-----|---------|------|-------|------|----------|
| Pt 30 | 114.8 | 88-131 | 62.5 | 5/8   | 107 | 105-110 | 100  | 8/8   | 62.5 | 5/8   | 140 | 126-169 | 62.5 | 5/8   | 7.3  | 4.9-10.6 |
| Pt 32 | 118.4 | 92-138 | 53.8 | 7/13  | 101 | 97-105  | 53.8 | 7/13  | 53.8 | 7/13  | 260 | 113-539 | 7.7  | 1/13  | 5.7  | 3.3-9.9  |
| Pt 33 | 107   | 72-142 | 75   | 27/36 | 93  | 86-101  | 2.8  | 1/36  | 72.2 | 26/36 | 222 | 121-329 | 5.6  | 2/36  | 6.3  | 3.2-11   |
| Pt 34 | 84.1  | 61-105 | 100  | 20/20 | 117 | 100-133 | 90   | 18/20 | 100  | 20/20 | 20  | 4-48    | 100  | 20/20 | 11.6 | 6.4-25.5 |
| Pt 35 | 100.3 | 74-119 | 100  | 15/15 | 109 | 99-121  | 93.3 | 14/15 | 93.3 | 14/15 | 144 | 61-230  | 46.7 | 7/15  | 7.2  | 2.8-15.8 |
| Pt 36 | 102.6 | 64-146 | 80.6 | 54/67 | 102 | 88-112  | 58.2 | 39/67 | 70.1 | 47/67 | 152 | 80-305  | 40.3 | 27/67 | 4.4  | 1.1-8.5  |
| Pt 38 | 106.8 | 98-117 | 100  | 8/8   | 105 | 102-109 | 100  | 8/8   | 87.5 | 7/8   | 183 | 130-234 | 12.5 | 1/8   | 7.5  | 4.9-11   |
| Pt 39 | 113.9 | 74-158 | 57.9 | 11/19 | 103 | 92-114  | 78.9 | 15/19 | 68.4 | 13/19 | 163 | 101-273 | 42.1 | 8/19  | 5.4  | 2.5-11.3 |
| Pt 40 | 83.3  | 61-127 | 90   | 9/10  | 100 | 91-108  | 40   | 4/10  | 90   | 9/10  | 79  | 53-101  | 100  | 10/10 | 2.9  | 1.5-3.9  |
| Pt 41 | 79.3  | 64-91  | 100  | 8/8   | 97  | 95-99   | 0    | 0/8   | 100  | 8/8   | 156 | 113-248 | 50   | 4/8   | 3.9  | 3.1-5.1  |
| Pt 42 | 82.1  | 71-92  | 100  | 16/16 | 104 | 99-112  | 81.3 | 13/16 | 100  | 16/16 | 77  | 22-113  | 100  | 16/16 | 6.6  | 4.6-10.6 |

**Supplementary Table S9. Main characteristics of *UBA1*-negative patients.** Abbreviations: MCV, mean corpuscular volume; +, present; -, absent.

|       | Sex    | Status   | Age at Onset (years) | Neutrophilic dermatosis | Recurrent Fever | Pulmonary Manifestations | Relapsing polycondritis | Recurrent arthritis | Venous thromboembolism | Hematology              |             |                                  |                                   |
|-------|--------|----------|----------------------|-------------------------|-----------------|--------------------------|-------------------------|---------------------|------------------------|-------------------------|-------------|----------------------------------|-----------------------------------|
|       |        |          |                      |                         |                 |                          |                         |                     |                        | Hemoglobin <120 g/L g/L | MCV >100 fL | Leukocytes <4·10 <sup>9</sup> /L | Platelets <140·10 <sup>9</sup> /L |
| Pt 2  | Male   | Deceased | 60                   | +                       | -               | +                        | -                       | -                   | -                      | +                       | +           | -                                | +                                 |
| Pt 5  | Male   | Deceased | 67                   | +                       | +               | -                        | +                       | -                   | -                      | +                       | -           | -                                | +                                 |
| Pt 7  | Male   | Alive    | 69                   | +                       | +               | +                        | -                       | -                   | -                      | +                       | +           | -                                | -                                 |
| Pt 11 | Male   | Alive    | 38                   | +                       | +               | -                        | -                       | -                   | -                      | +                       | -           | -                                | -                                 |
| Pt 13 | Female | Alive    | 63                   | +                       | +               | -                        | -                       | -                   | -                      | +                       | -           | +                                | +                                 |
| Pt 18 | Male   | Alive    | 55                   | -                       | -               | -                        | +                       | +                   | +                      | +                       | +           | -                                | -                                 |
| Pt 19 | Male   | Alive    | 39                   | -                       | +               | +                        | +                       | -                   | -                      | -                       | +           | -                                | +                                 |
| Pt 23 | Male   | Deceased | 71                   | -                       | -               | +                        | -                       | -                   | +                      | +                       | +           | +                                | +                                 |
| Pt 27 | Male   | Alive    | 51                   | -                       | +               | +                        | +                       | -                   | -                      | +                       | -           | -                                | -                                 |
| Pt 28 | Male   | Alive    | 52                   | +                       | -               | +                        | +                       | -                   | -                      | +                       | +           | -                                | -                                 |
| Pt 31 | Male   | Alive    | 45                   | +                       | +               | +                        | -                       | +                   | -                      | +                       | -           | +                                | -                                 |
| Pt 37 | Male   | Alive    | 50                   | -                       | -               | -                        | +                       | +                   | -                      | +                       | +           | -                                | -                                 |

**Supplementary Table S10. ADS-Leukocyte Subpopulations. Amplicon-based Deep *UBA1* Sequencing Analyses of Isolated Leukocyte****Subpopulations.** <sup>1</sup>RefSeq: NM\_003334.4. <sup>2</sup>Mean of data collected from three independent experiments. Abbreviations: SD, standard deviation.

| Patient | Leukocyte Subpopulation | <i>UBA1</i> Variant <sup>1</sup> | Mutant Allele Frequency - Mean (SD) <sup>2</sup> | Coverage – Mean (SD) <sup>2</sup> |
|---------|-------------------------|----------------------------------|--------------------------------------------------|-----------------------------------|
| Pt 3    | Peripheral blood        | p.Met41Thr                       | 76.3% (1.1)                                      | 7486x (893)                       |
|         | Neutrophils             | p.Met41Thr                       | 97.9% (0.5)                                      | 8842x (415)                       |
|         | Monocytes               | p.Met41Thr                       | 98.0% (0.2)                                      | 24941x (2271)                     |
|         | T cells                 | p.Met41Thr                       | 0.5% (0.1)                                       | 22253x (4110)                     |
|         | B cells                 | p.Met41Thr                       | 0.3% (0.1)                                       | 21167x (2580)                     |
|         | CD34 <sup>+</sup> cells | p.Met41Thr                       | 97.1% (0.2)                                      | 5752x (2536)                      |
| Pt 9    | Peripheral blood        | p.Met41Thr                       | 60.7% (1.0)                                      | 4621x (525)                       |
|         | Neutrophils             | p.Met41Thr                       | 60.5% (10.9)                                     | 9255x (875)                       |
|         | Monocytes               | p.Met41Thr                       | 87.7% (0.3)                                      | 10629x (519)                      |
|         | T cells                 | p.Met41Thr                       | 0.7% (0.2)                                       | 10983x (2582)                     |
|         | B cells                 | p.Met41Thr                       | 0.9% (0.4)                                       | 8670x (826)                       |

**Supplementary Table S11. Evaluation of post-zygotic *UBA1* variants in non-hematopoietic tissues.** <sup>1</sup>RefSeq: NM\_003334.4. <sup>2</sup>Mean of data collected from three independent experiments. Abbreviations: SD, standard deviation.

| Patient | Nucleotide <i>UBA1</i> Variant <sup>1</sup> | Amino Acid Exchange <sup>1</sup> | Sample | Mutant Allele Frequency - Mean (SD) <sup>2</sup> | Coverage – Mean (SD) <sup>2</sup> |
|---------|---------------------------------------------|----------------------------------|--------|--------------------------------------------------|-----------------------------------|
| Pt 1    | c.121A>G                                    | p.Met41Val                       | Nails  | 5.4% (0.4)                                       | 634x (255)                        |
| Pt 6    | c.122T>C                                    | p.Met41Thr                       | Nails  | 73.7% (8.4)                                      | 906x (188)                        |
| Pt 9    | c.122T>C                                    | p.Met41Thr                       | Nails  | 8.5% (1.6)                                       | 1556x (157)                       |
| Pt 16   | c.121A>G                                    | p.Met41Val                       | Nails  | 2.7% (2.7)                                       | 429x (112)                        |
| Pt 21   | c.121A>C                                    | p.Met41Leu                       | Nails  | 62.9% (3.8)                                      | 4217x (274)                       |
| Pt 22   | c.121A>G                                    | p.Met41Val                       | Nails  | 16.3% (0.3)                                      | 2289x (142)                       |
| Pt 25   | c.122T>C                                    | p.Met41Thr                       | Nails  | 9.9% (1.3)                                       | 1609x (188)                       |
| Pt 30   | c.122T>C                                    | p.Met41Thr                       | Nails  | 16.5% (5.7)                                      | 866x (498)                        |
| Pt 36   | c.122T>C                                    | p.Met41Thr                       | Nails  | 18.4% (2.1)                                      | 4763x (513)                       |

**Supplementary Table S12. Outcome of administered treatments in genetically-confirmed VEXAS patients.** Abbreviations: NSAID, non-steroidal anti-inflammatory drugs; GCs, Glucocorticoids; MTX, Methotrexate; MMF, Mycophenolate mofetil; AZA, Azathioprine; CYF, Cyclophosphamide; IVIGs, intravenous immunoglobulins; Inh, inhibitor; ATB, antibiotics; CyA, Cyclosporine A; allo-HSCT, allogeneic haematopoietic stem cell transplantation; HCQ, Hydroxychloroquine; Neg, negative; PR, partial response; CR, complete response; n.a., not administered.

|       | Colchicine | NSAIDs | GCs | MTX  | MMF  | AZA  | CYF  | IVIGs | TNF-inh | IL-6-inh | IL-1-inh | Anti-CD20 | Jak-inh | Others      |
|-------|------------|--------|-----|------|------|------|------|-------|---------|----------|----------|-----------|---------|-------------|
| Pt 1  | Neg        | Neg    | CR  | Neg  | -    | Neg  | n.a. | n.a.  | n.a.    | Neg      | n.a.     | n.a.      | Neg     | ATB         |
| Pt 3  | PR         | n.a.   | CR  | PR   | n.a. | n.a. | n.a. | n.a.  | n.a.    | Neg      | PR       | PR        | n.a.    | CyA         |
| Pt 4  | Neg        | PR     | CR  | Neg  | n.a. | Neg  | n.a. | Neg   | n.a.    | n.a.     | n.a.     | n.a.      | n.a.    |             |
| Pt 6  | Neg        | Neg    | CR  | Neg  | n.a. | n.a. | n.a. | n.a.  | n.a.    | Neg      | PR       | Neg       | Neg     | Azacytidine |
| Pt 8  | n.a.       | Neg    | CR  | Neg  | n.a. | n.a. | n.a. | n.a.  | n.a.    | n.a.     | n.a.     | n.a.      | n.a.    |             |
| Pt 9  | n.a.       | n.a.   | PR  | PR   | n.a. | n.a. | n.a. | n.a.  | n.a.    | n.a.     | n.a.     | n.a.      | n.a.    | Decitabine  |
| Pt 10 | n.a.       | n.a.   | CR  | n.a. | n.a. | n.a. | n.a. | n.a.  | n.a.    | n.a.     | n.a.     | n.a.      | n.a.    | Allo-HSCT   |
| Pt 12 | n.a.       | PR     | CR  | n.a. | n.a. | Neg  | n.a. | n.a.  | n.a.    | n.a.     | n.a.     | n.a.      | n.a.    |             |
| Pt 14 | n.a.       | PR     | CR  | n.a. | n.a. | PR   | PR   | PR    | n.a.    | n.a.     | n.a.     | n.a.      | n.a.    |             |
| Pt 15 | Neg        | PR     | CR  | Neg  | n.a. | n.a. | n.a. | n.a.  | n.a.    | n.a.     | n.a.     | n.a.      | n.a.    | HCQ         |
| Pt 16 | n.a.       | Neg    | CR  | Neg  | n.a. | n.a. | n.a. | n.a.  | n.a.    | n.a.     | n.a.     | n.a.      | n.a.    | ATB         |
| Pt 17 | n.a.       | Neg    | CR  | PR   | PR   | Neg  | n.a. | n.a.  | n.a.    | n.a.     | n.a.     | n.a.      | n.a.    |             |
| Pt 20 | n.a.       | PR     | CR  | Neg  | Neg  | n.a. | n.a. | Neg   | n.a.    | PR       | Neg      | PR        | PR      | CyA         |
| Pt 21 | n.a.       | Neg    | PR  | Neg  | n.a. | n.a. | n.a. | n.a.  | n.a.    | n.a.     | n.a.     | n.a.      | n.a.    |             |
| Pt 22 | n.a.       | PR     | CR  | PR   | Neg  | n.a. | n.a. | n.a.  | n.a.    | n.a.     | n.a.     | n.a.      | PR      | HCQ         |
| Pt 24 | Neg        | n.a.   | PR  | n.a. | n.a. | n.a. | n.a. | n.a.  | n.a.    | n.a.     | n.a.     | n.a.      | CR      |             |
| Pt 25 | Neg        | n.a.   | CR  | PR   | n.a. | n.a. | n.a. | n.a.  | Neg     | PR       | n.a.     | PR        | n.a.    |             |

|       |      |      |     |      |      |      |      |      |      |      |      |      |      |     |
|-------|------|------|-----|------|------|------|------|------|------|------|------|------|------|-----|
| Pt 26 | n.a. | PR   | PR  | PR   | n.a. | PR   | n.a. |     |
| Pt 29 | Neg  | Neg  | PR  | n.a. | n.a. | Neg  | n.a. | Neg  | n.a. | Neg  | PR   | n.a. | n.a. | ATB |
| Pt 30 | n.a. | n.a. | CR  | n.a. |     |
| Pt 32 | n.a. | n.a. | CR  | Neg  | Neg  | Neg  | n.a. | n.a. | n.a. | CR   | Neg  | n.a. | n.a. |     |
| Pt 33 | n.a. | n.a. | CR  | n.a. |     |
| Pt 34 | n.a. | n.a. | Neg | n.a. |     |
| Pt 35 | Neg  | PR   | PR  | Neg  | n.a. | n.a. | n.a. | n.a. | n.a. | Neg  | n.a. | n.a. | n.a. |     |
| Pt 36 | n.a. | PR   | CR  | Neg  | Neg  | n.a. | n.a. | n.a. | Neg  | n.a. | n.a. | n.a. | n.a. | ATB |
| Pt 38 | Neg  | n.a. | CR  | n.a. |     |
| Pt 39 | n.a. | Neg  | PR  | n.a. | n.a. | n.a. | Neg  | n.a. | n.a. | n.a. | n.a. | n.a. | n.a. |     |
| Pt 40 | n.a. | n.a. | CR  | n.a. |     |
| Pt 41 | n.a. | n.a. | CR  | n.a. | ATB |
| Pt 42 | PR   | n.a. | PR  | n.a. | Neg  | Neg  | n.a. | n.a. | Neg  | n.a. | n.a. | n.a. | n.a. |     |
