# Supplementary figures and images for: Spanish cohort of VEXAS syndrome: clinical manifestations, outcome of treatments and novel evidences about UBA1 mosaicism
Source: PubMed Central journal article supplement — Ann Rheum Dis. 2023 Sep 4;82(12):1594–605. doi: 10.1136/ard-2023-224460 (PMC10646843; doi:10.1136/ard-2023-224460), 2023-09-04

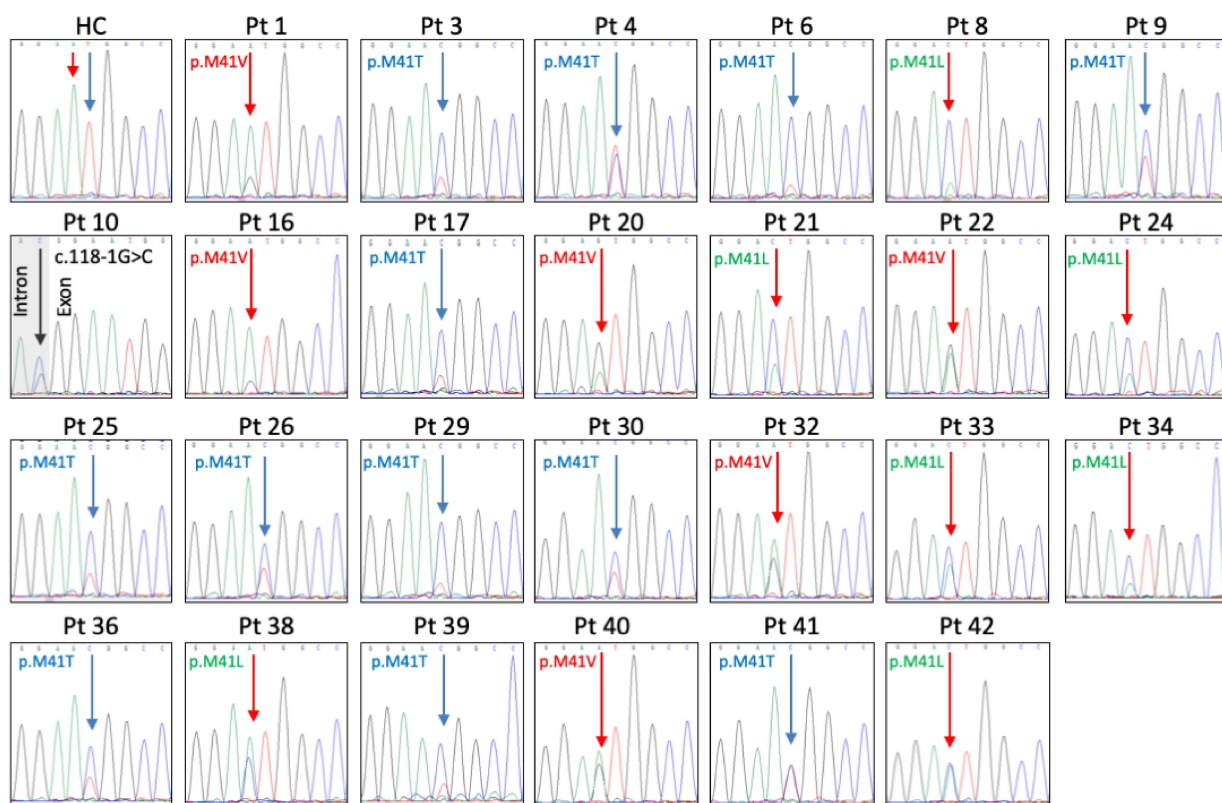

Supplement: ard-2023-224460supp001.pdf [file ard-2023-224460supp001.pdf]

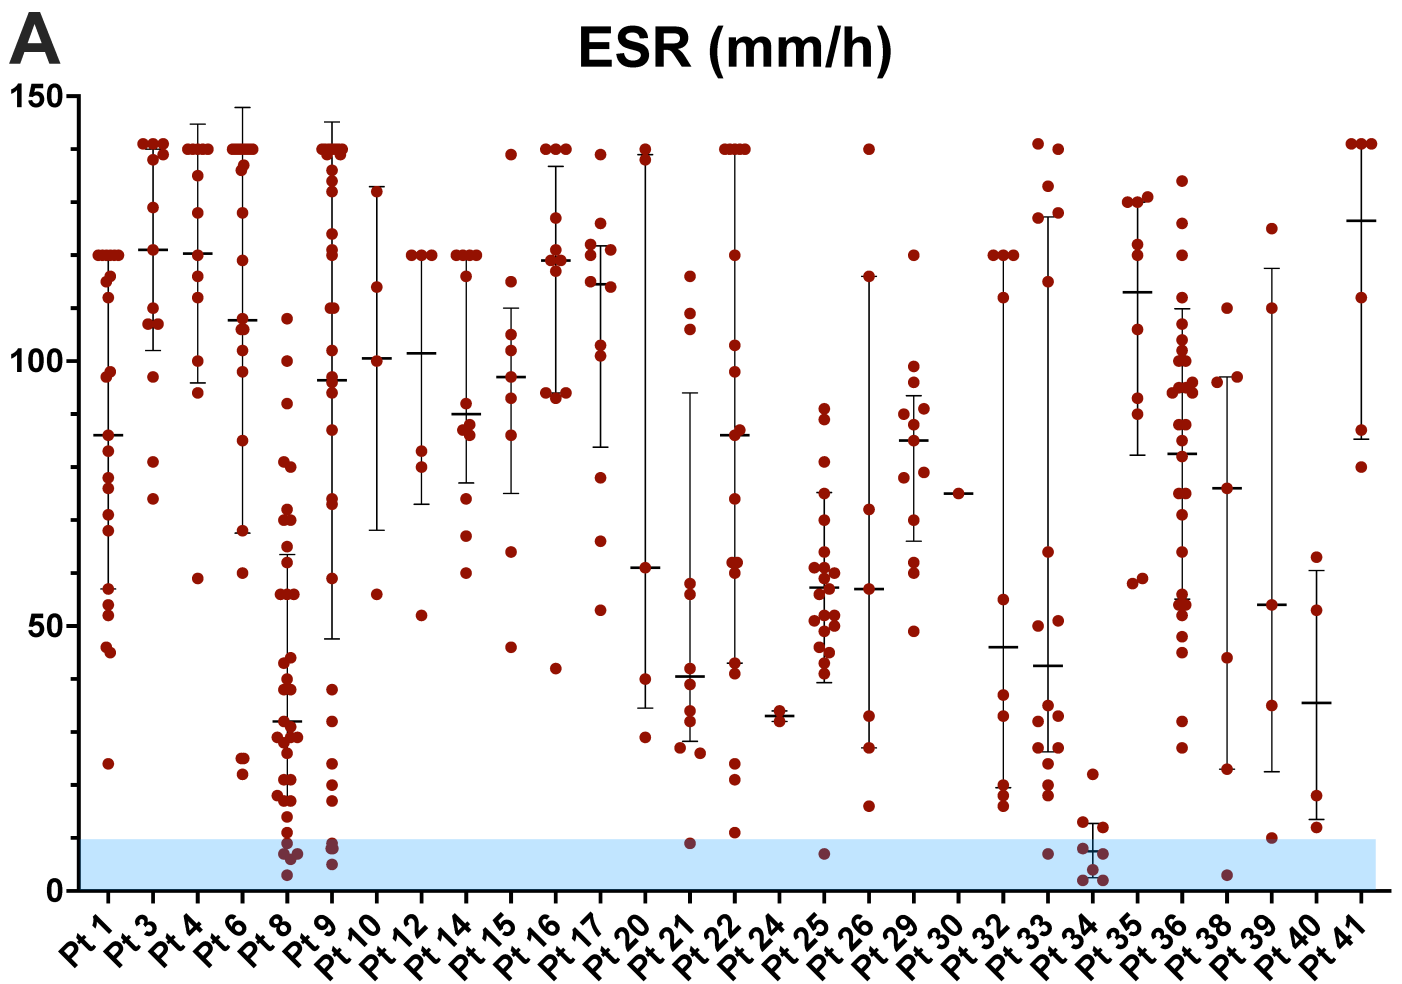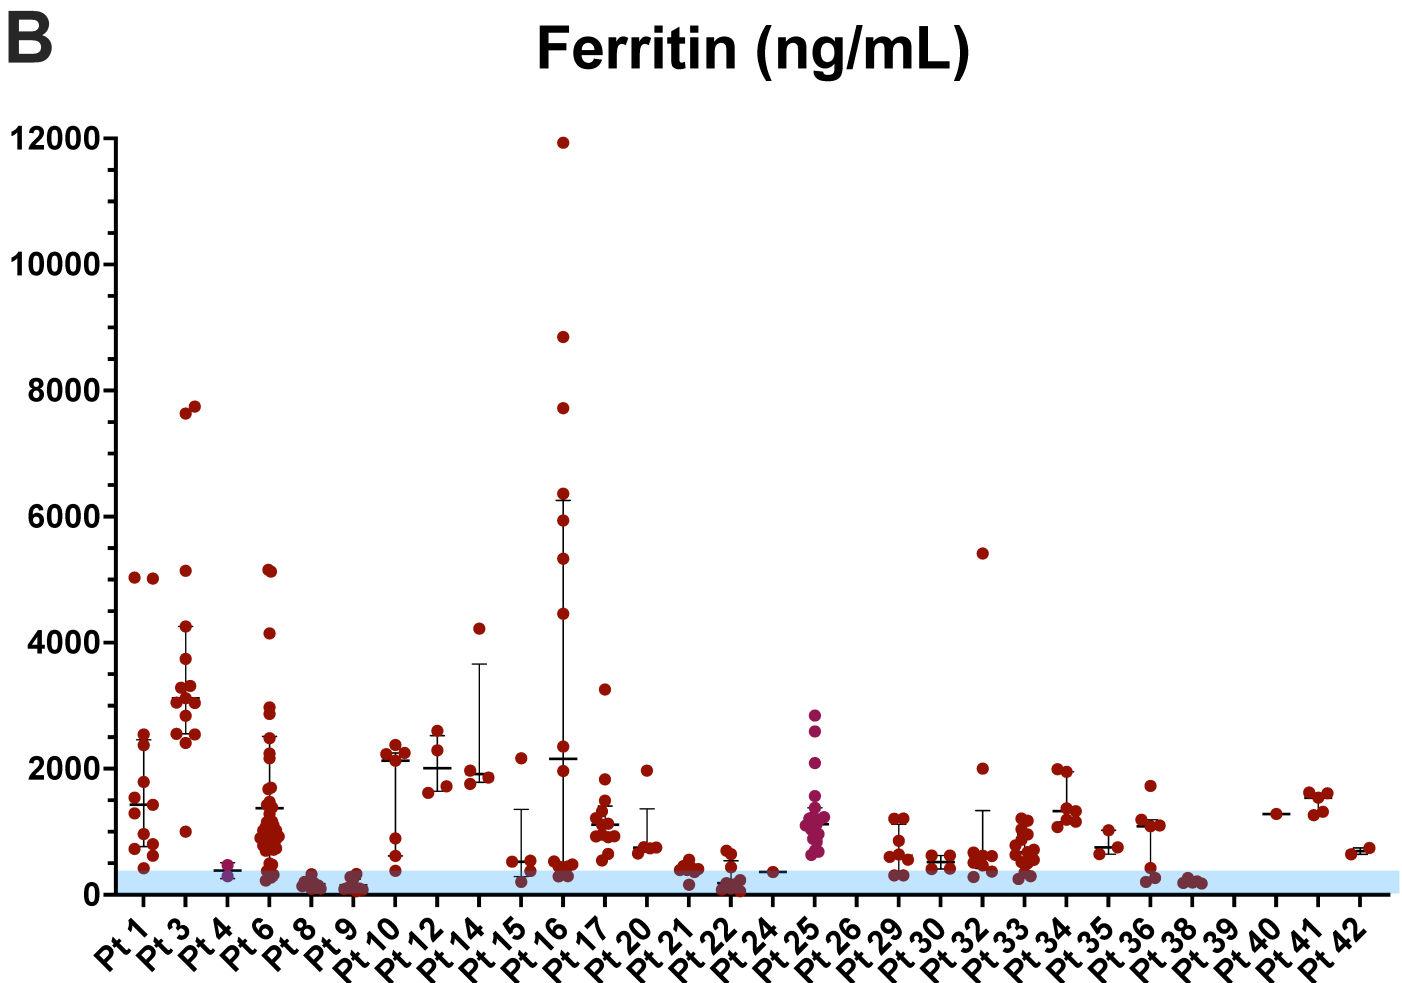

Supplement: ard-2023-224460supp002.pdf [file ard-2023-224460supp002.pdf]

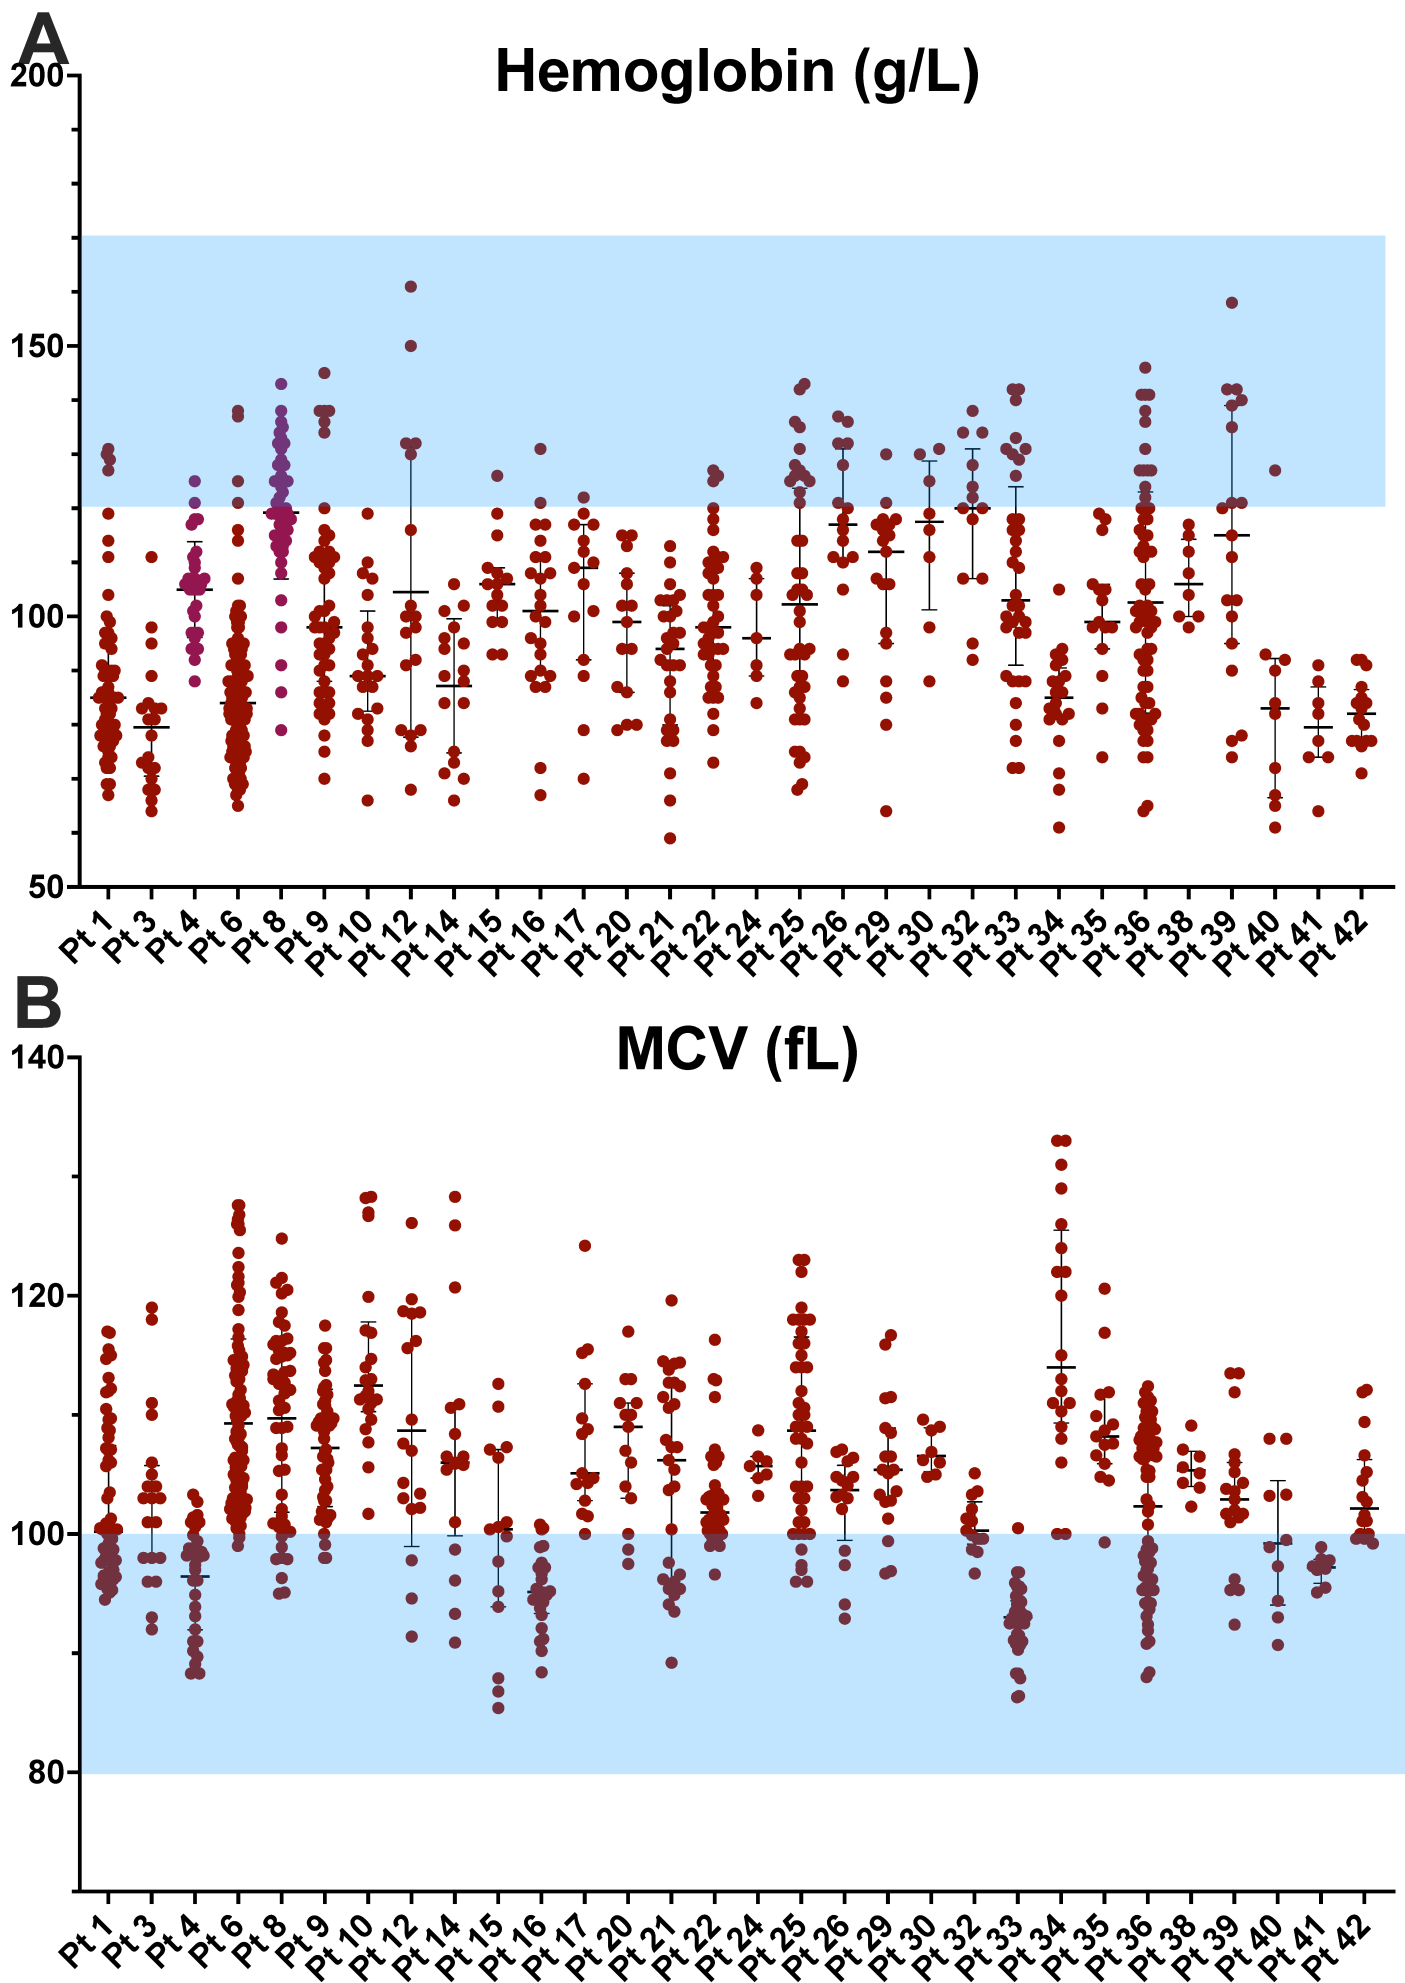

Supplement: ard-2023-224460supp003.pdf [file ard-2023-224460supp003.pdf]

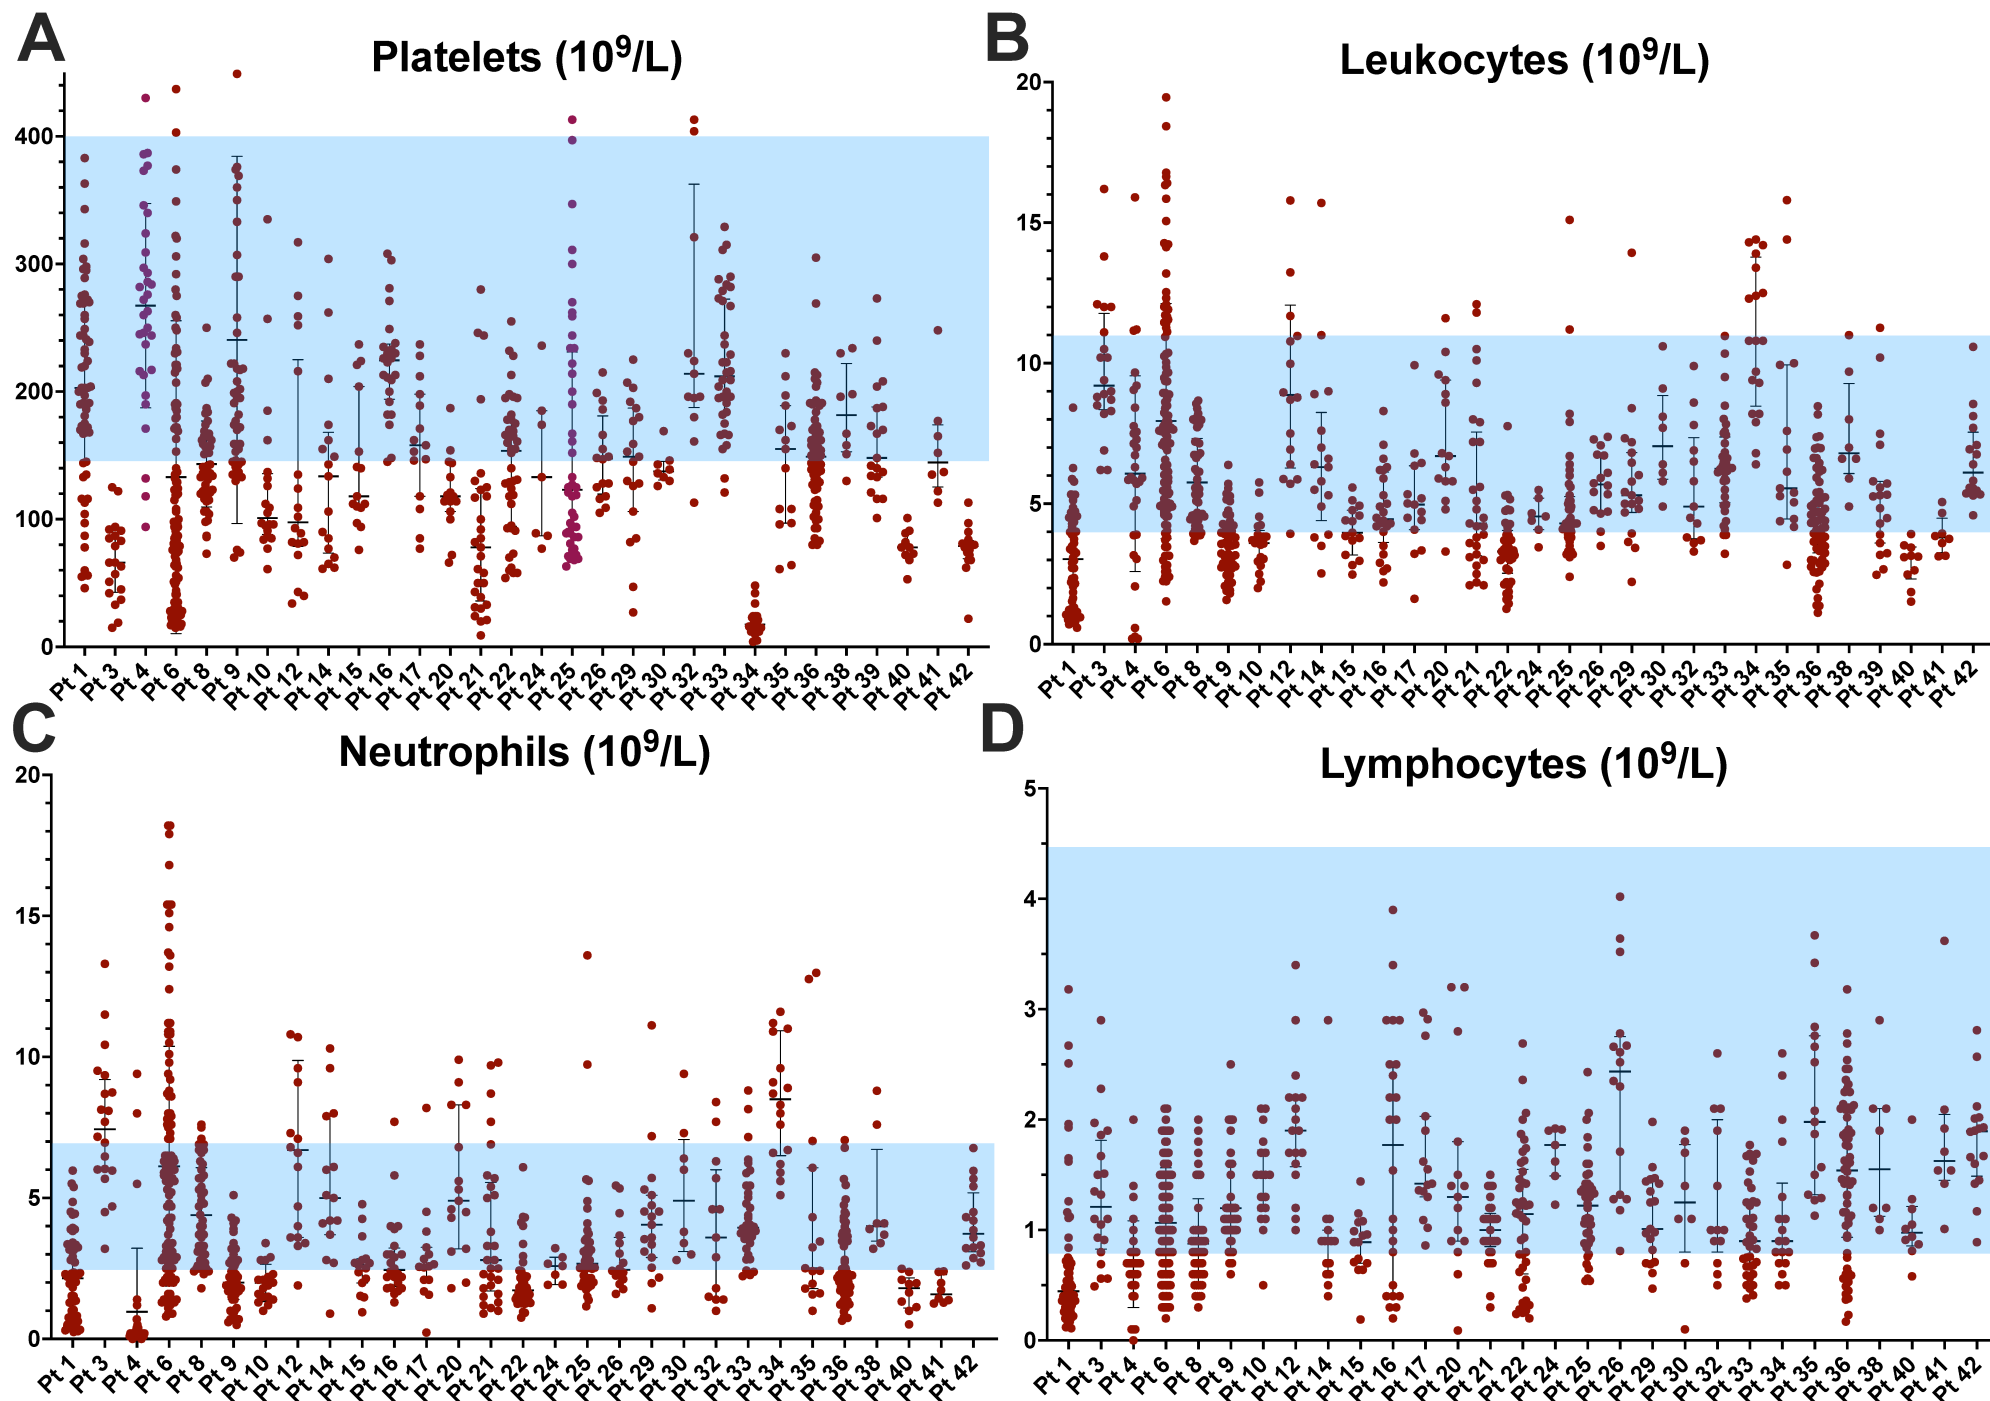

Supplement: ard-2023-224460supp004.pdf [file ard-2023-224460supp004.pdf]

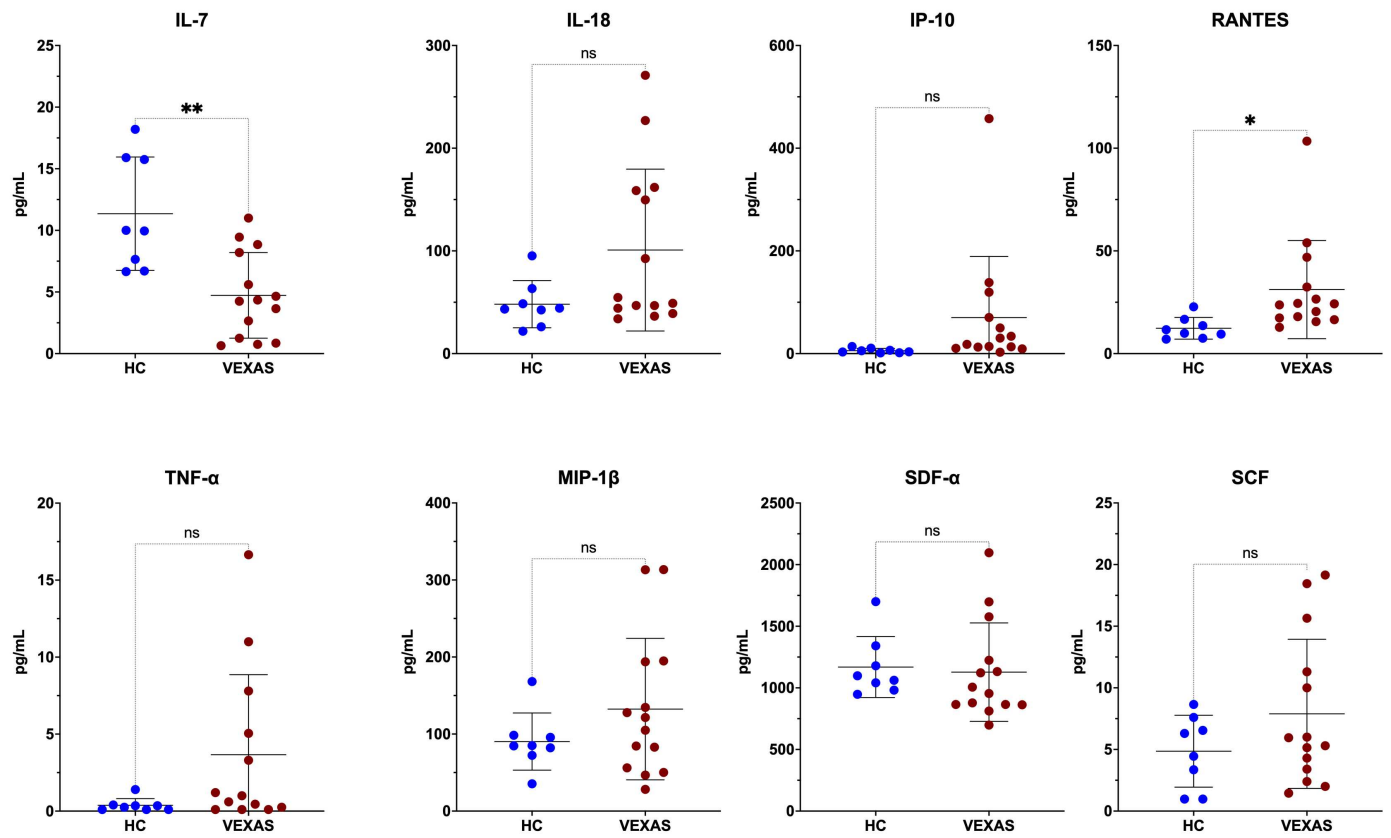

Supplement: ard-2023-224460supp005.pdf [file ard-2023-224460supp005.pdf]
